# Supplementary material for: Agropedogenesis: Humankind as the 6 th soil-forming factor and attractors of agrogenic soil degradation
Source: Copernicus journal article supplement (doi:10.5194/bg-2019-151), 2019-05-08
Supplement: Supplementary file 1 [file bg-2019-151-supplement.pdf]

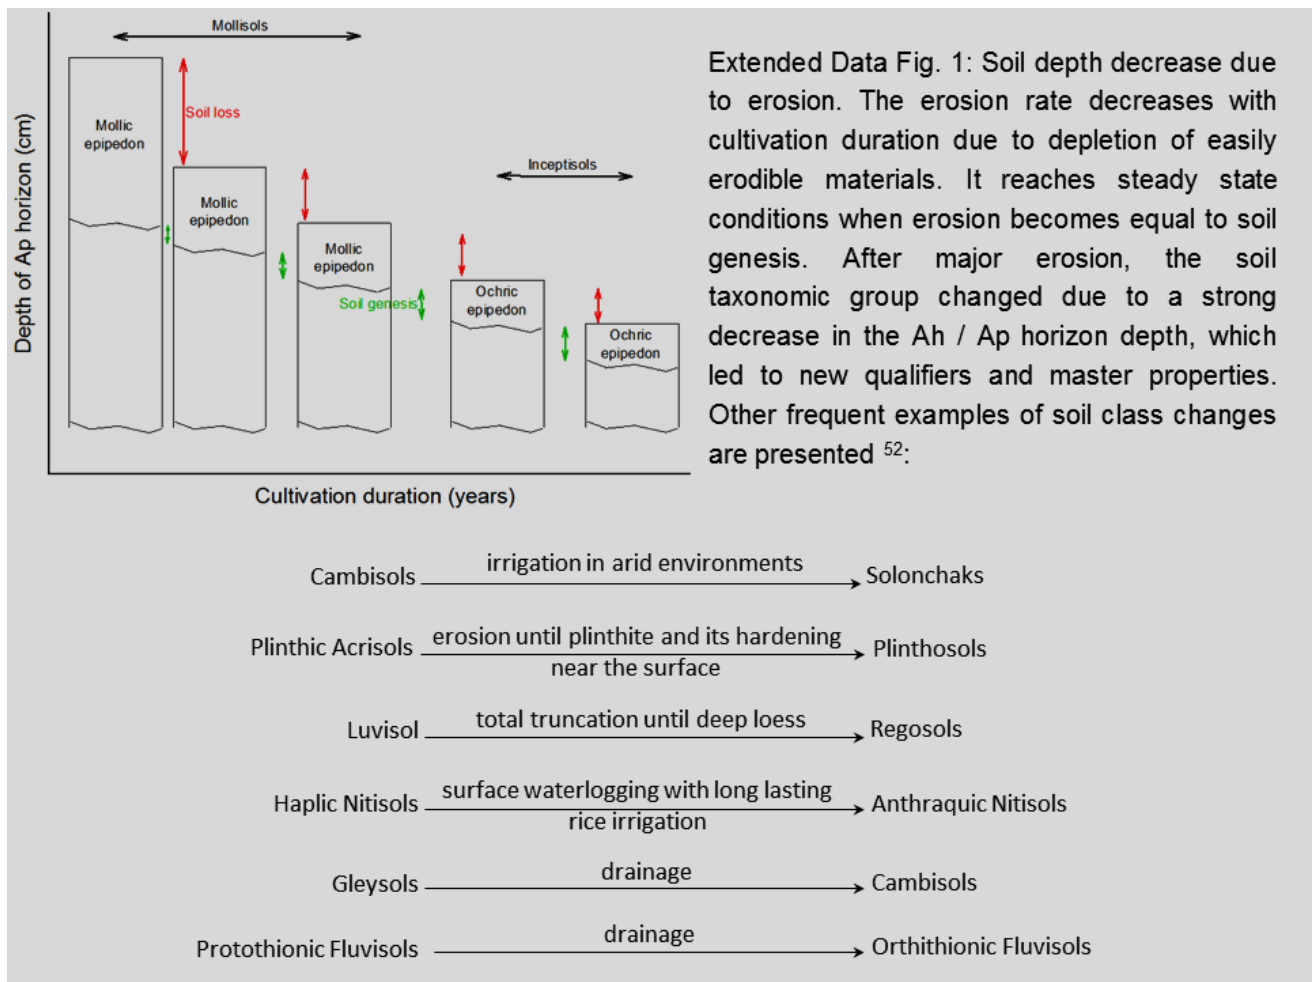

Supplementary Fig. 1: Soil depth decrease due to erosion. The erosion rate decreases with cultivation duration due to depletion of easily erodible materials. It reaches steady state conditions when erosion becomes equal to soil genesis. After major erosion, the soil taxonomic group changed due to a strong decrease in the Ah / Ap horizon depth, which led to new qualifiers and master properties. Other frequent examples of soil class changes are presented in (Dudal, 2004)
